# Supplementary figures and images for: Exploration of Lipid Metabolism Alterations in Children with Active Tuberculosis Using UHPLC-MS/MS
Source: Hindawi journal article supplement (doi:10.1155/2023/8111355), 2023-02-09

a

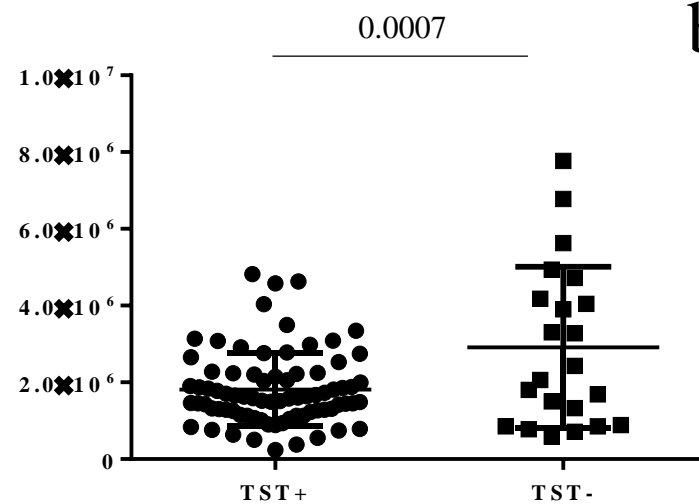

b

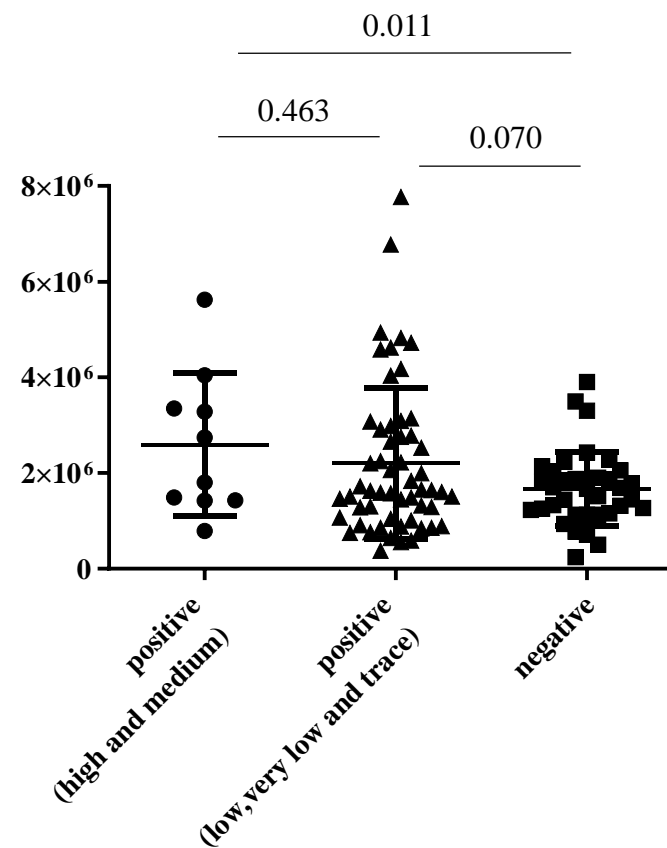

c

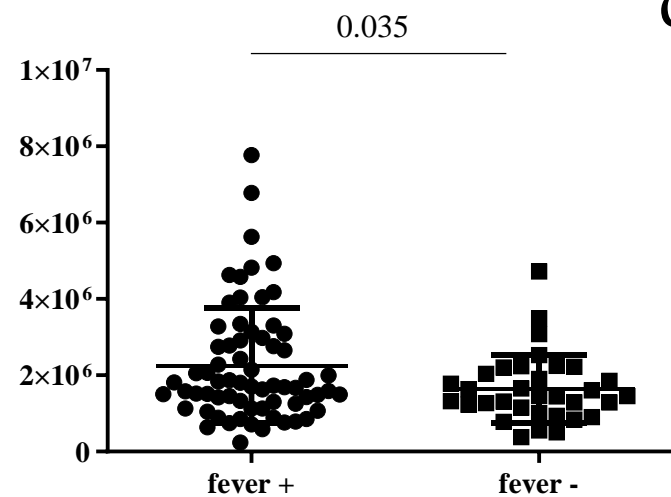

d

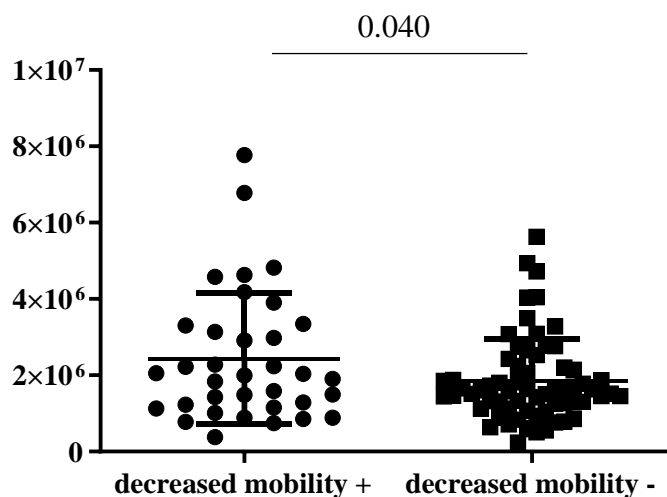

Supplement: f1 [file 8111355.f1.zip]

a

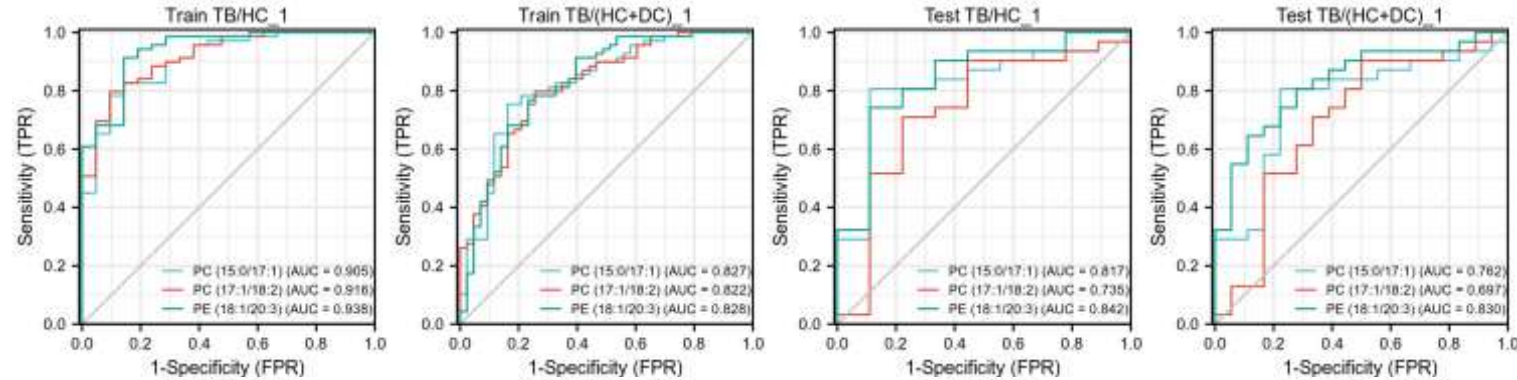

b

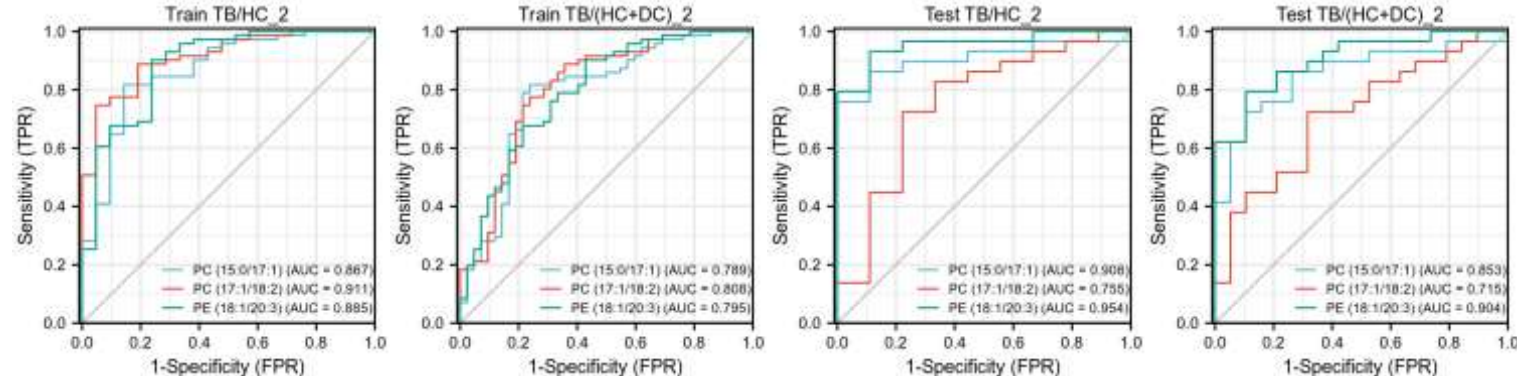

c

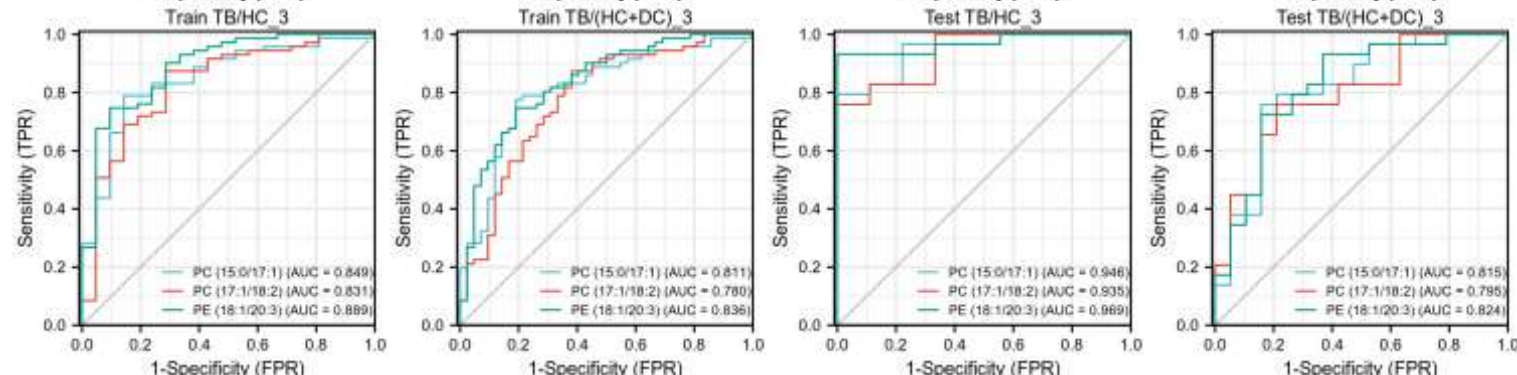

d

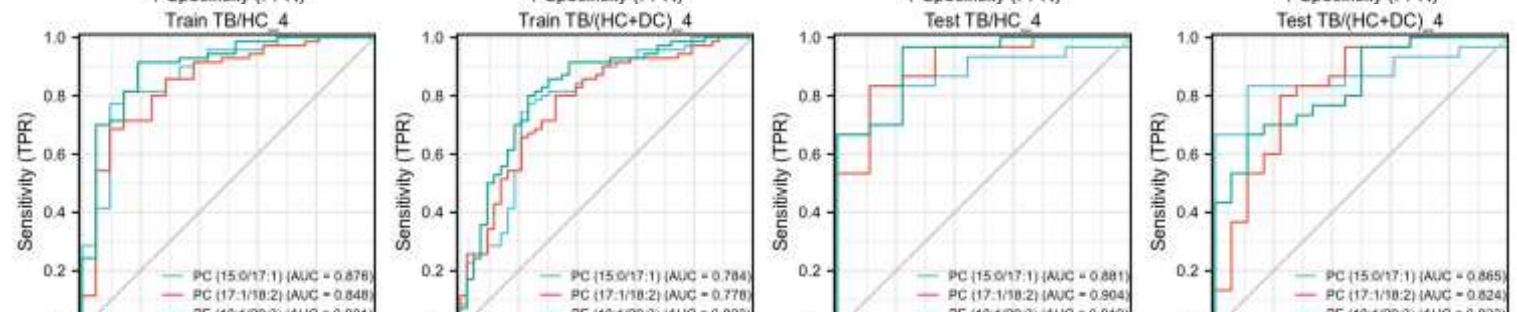

Supplement: f1 [file 8111355.f1.zip]

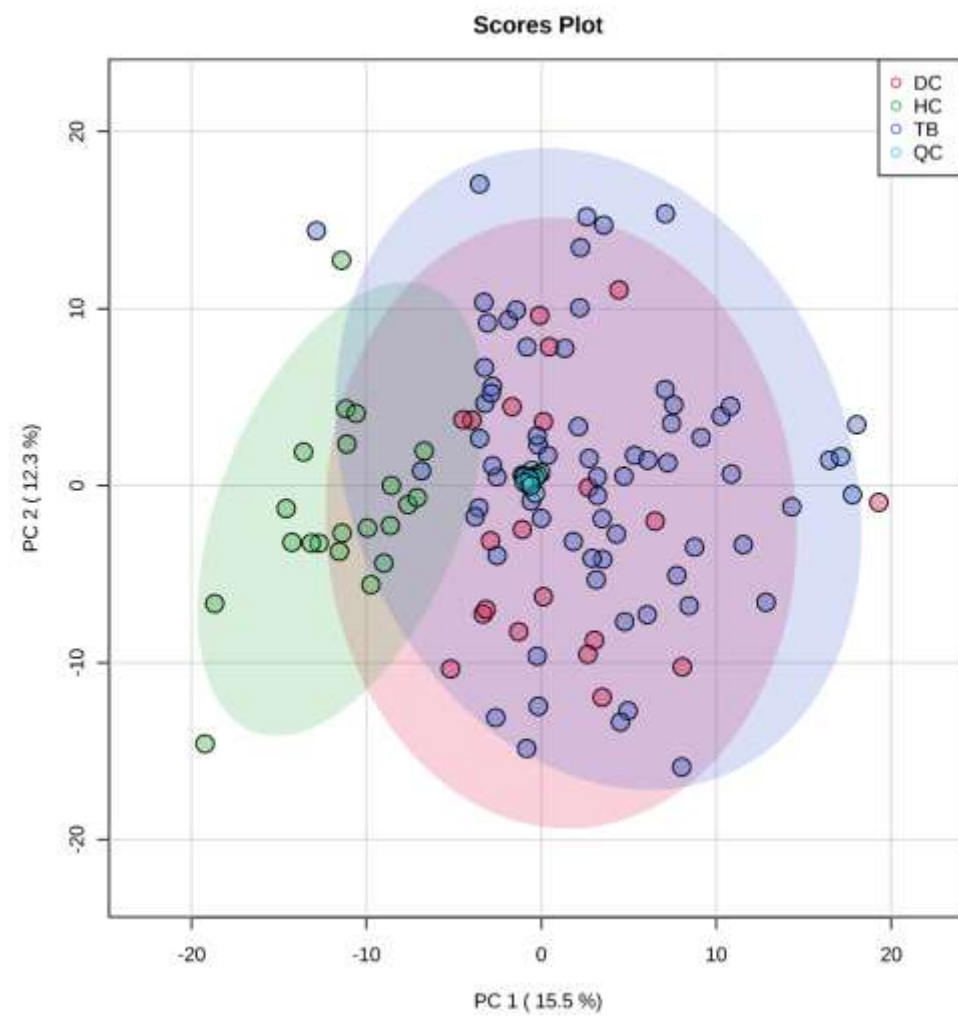

Supplement: f1 [file 8111355.f1.zip]
